# Supplementary material for: Integrative computational analyses implicate regulatory genomic elements contributing to spina bifida
Source: PubMed Central journal article supplement — Genet Med Open. 2024 Sep 14;2:101894. doi: 10.1016/j.gimo.2024.101894 (PMC11613821; doi:10.1016/j.gimo.2024.101894), 2024-09-14
Supplement: mmc1.pdf [file mmc1.pdf]

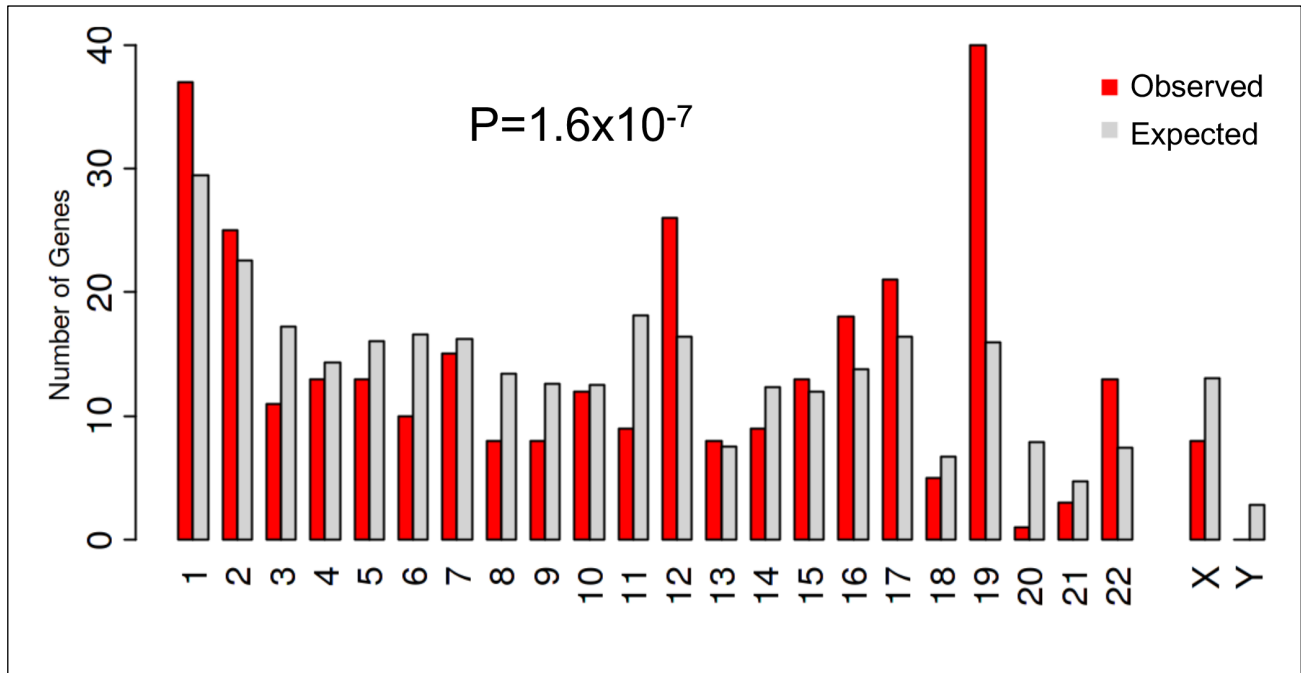

**Supplementary Figure 1: A chromosomal assessment of predicted target genes of TFBS-rSNVs in SB cases.** A chi-squared test was used to determine a genome-wide p-value for chromosomal differences between the expected and observed distribution of target genes affected in SB cases.

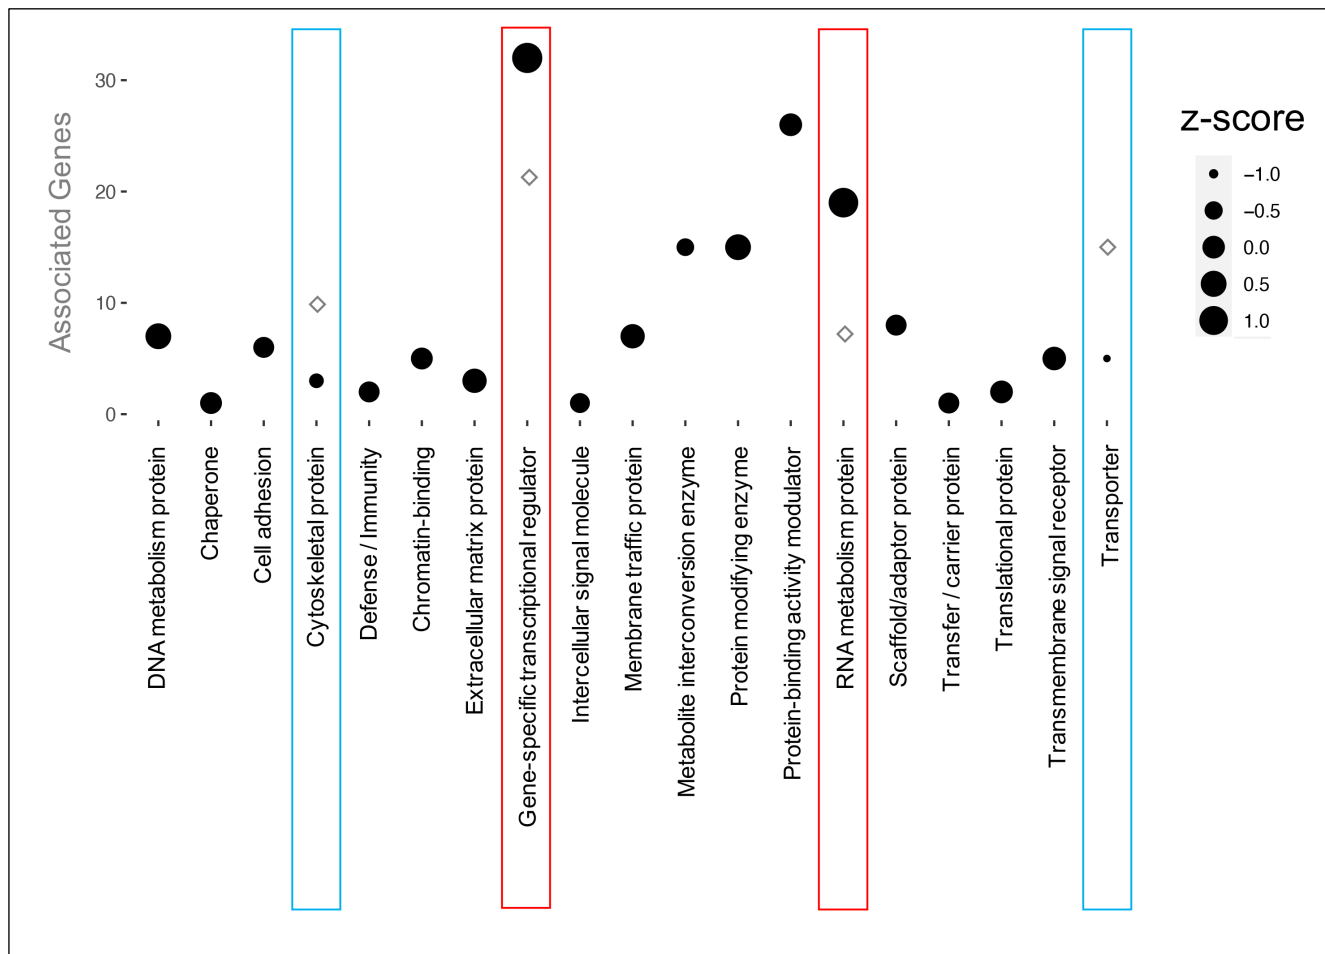

**Supplementary Figure 2: Protein classes differentially impacted in the TFBS-rSNV target genes between SB cases and controls.** Red boxes indicate an increase in SB cases and blue boxes represent a decrease in SB cases as compared to controls. Diamonds represent the values observed in controls.

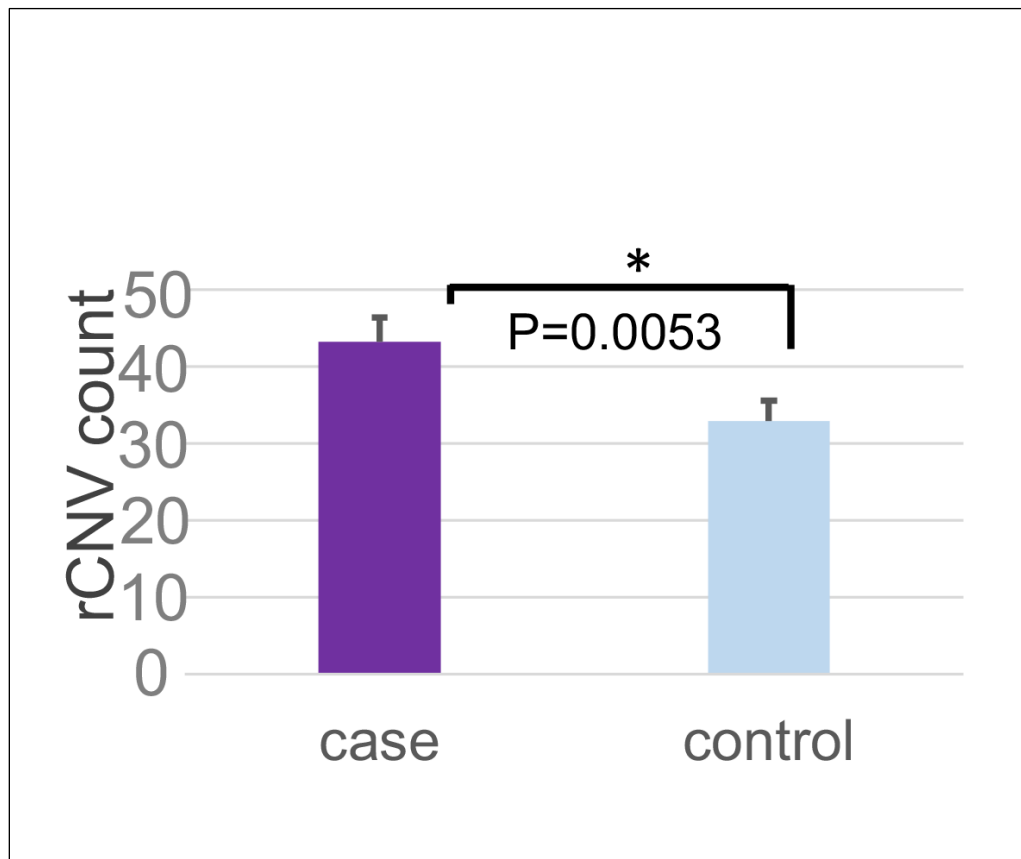

**Supplementary Figure 3: rCNVs in SB cases and controls overlapping putative critical regions (pCRs).** Data relevant to pCRs were obtained from Yousefi *et al.*, 2021.

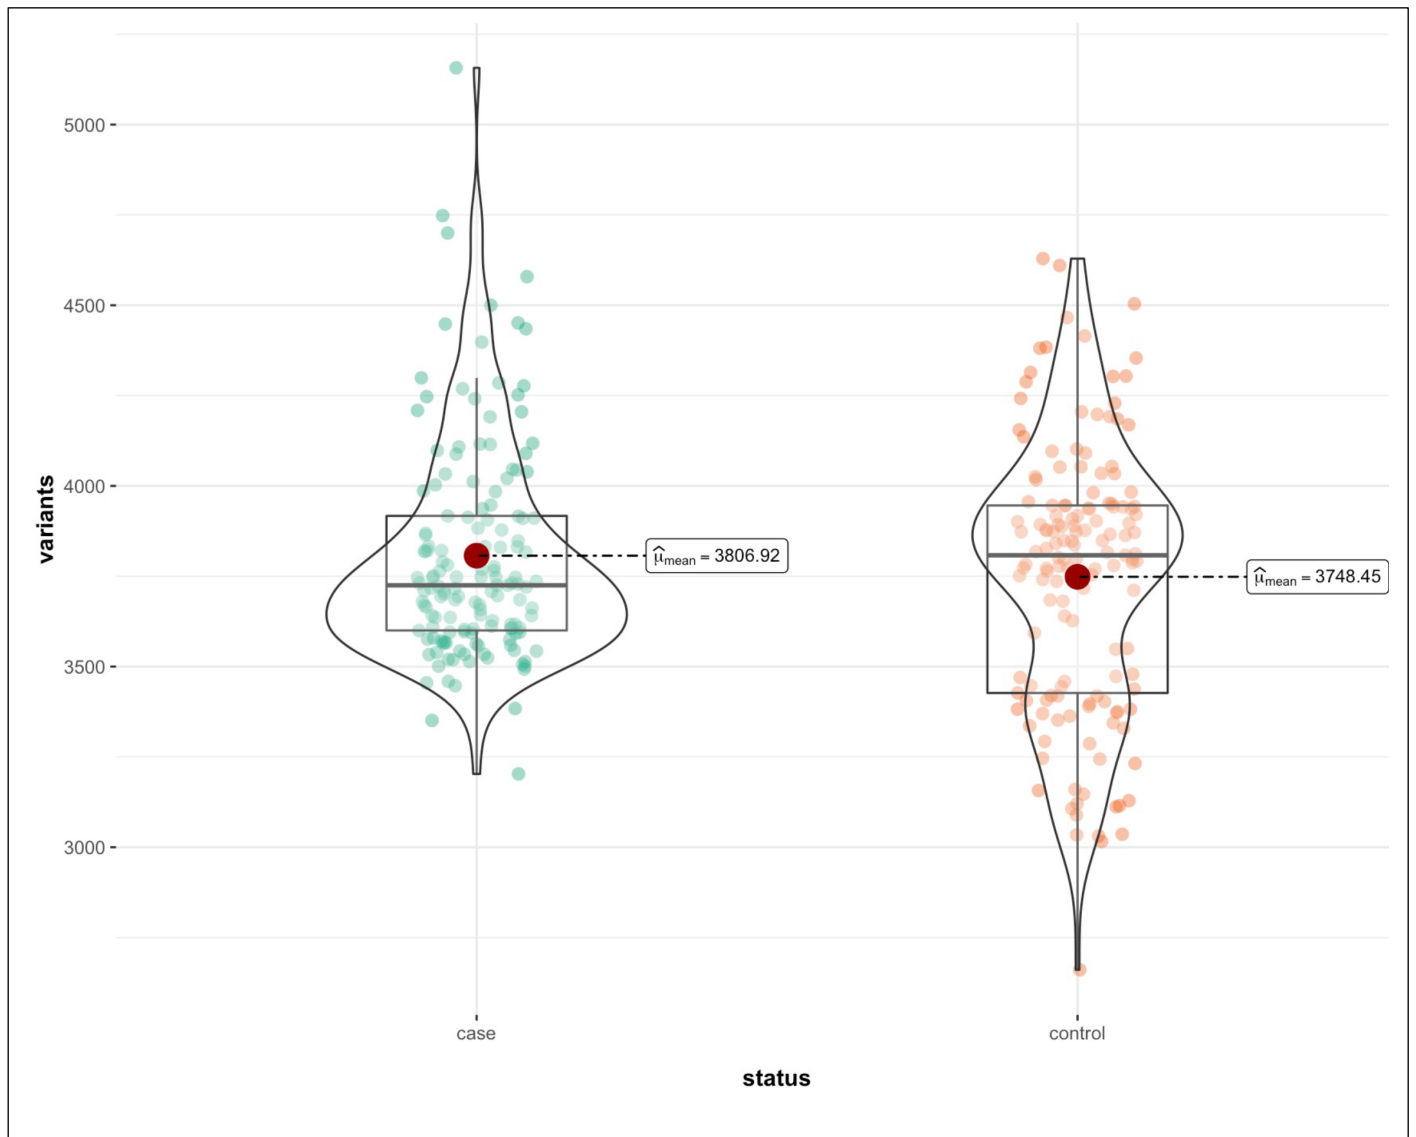

**Supplementary Figure 4: Rare (AF < 1%) brain enhancer SNVs detected in SB cases and controls.**

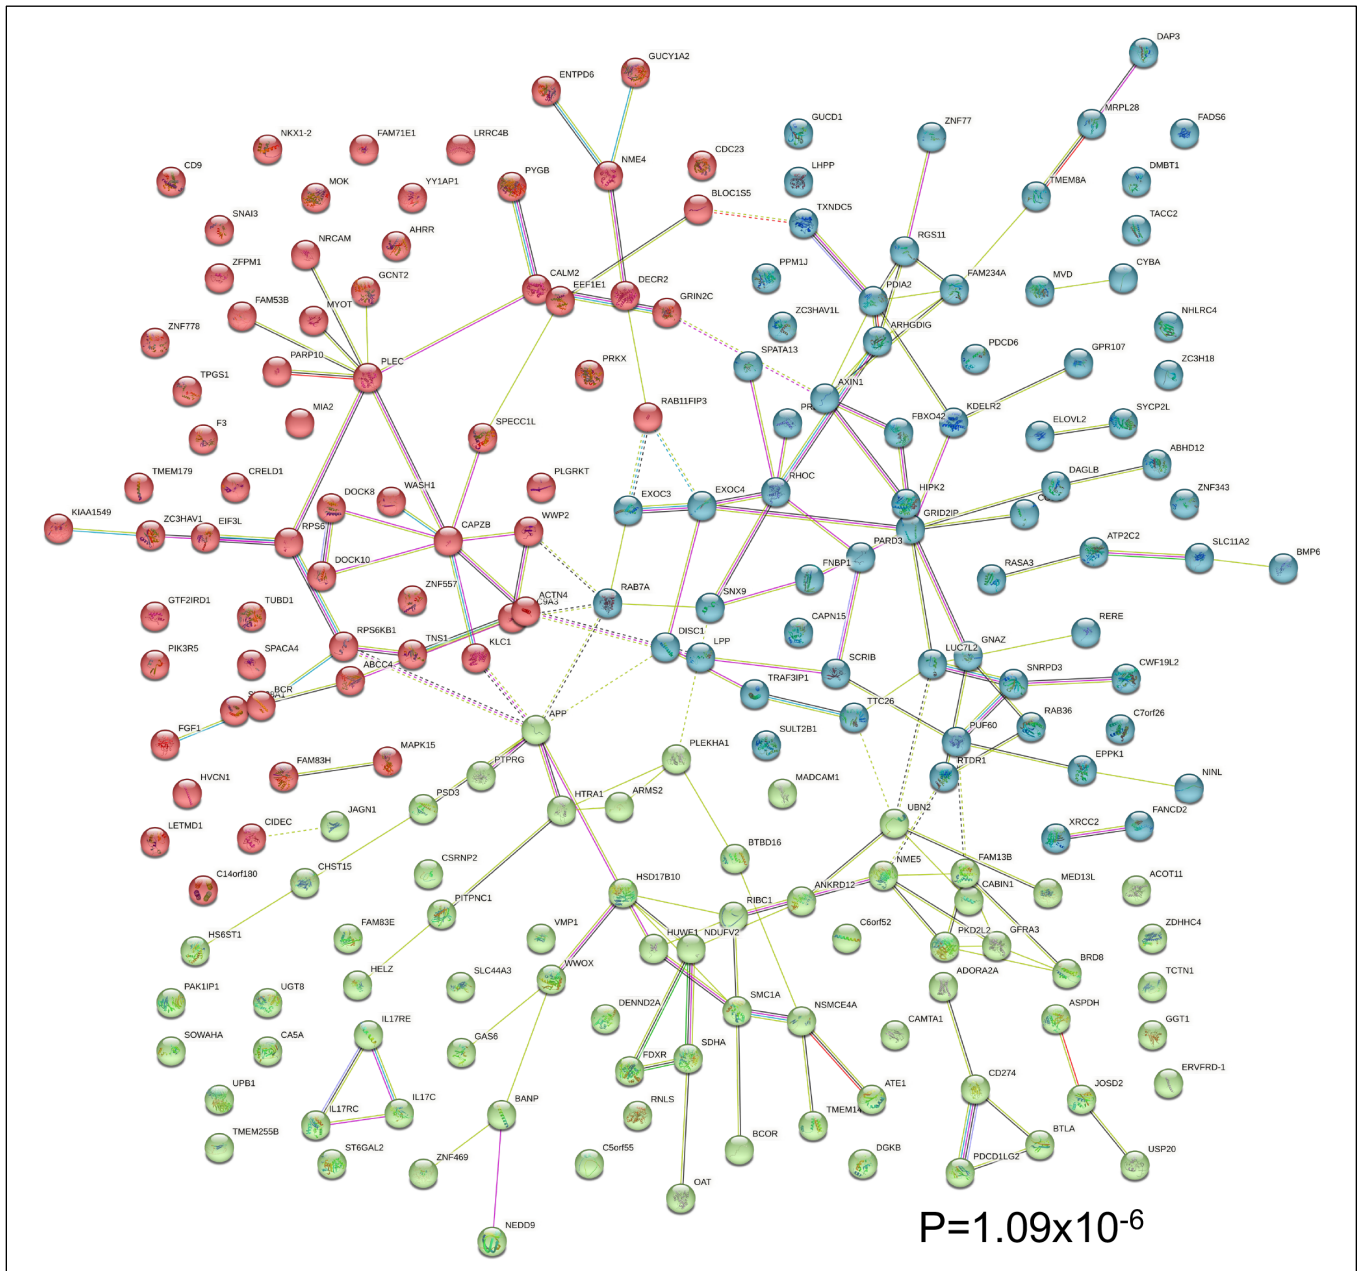

**Supplementary Figure 5: Protein-protein interactions within the set of enhancer-associated rare CNVs.** Red nodes represent interactions detected by fusion, green nodes represent interactions detected by neighborhood, and blue nodes represent interactions detected by co-occurrence.

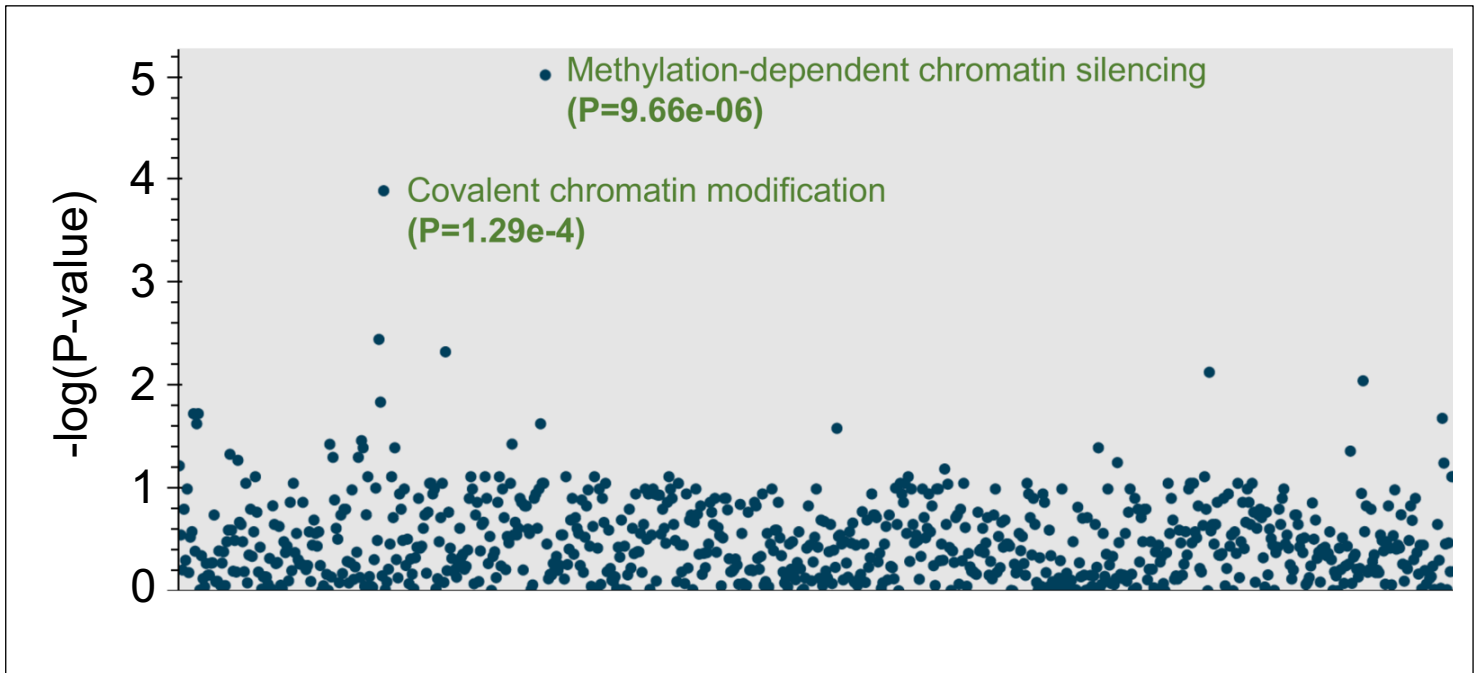

**Supplementary Figure 6: Annotations of rare CNVs in SB cases that impact gene promoters.** The statistically significant annotations are emphasized and include methylation-dependent chromatin silencing and covalent chromatin modification (each dot represents a different annotation).
